# Supplementary material for: Posterior lumbar interbody fusion for degenerative spondylolisthesis; slippage reduction can be a risk factor for adjacent segment disease.
Source: Research Square preprint supplement (doi:10.21203/rs.3.rs-4923331/v1), 2024-10-15
Supplement: Supplementary file 1 [file 1431f592de0b6ad0a74c3133.docx]

Table 1. Patient demographic data and radiographic parameters before surgery a, b.

All patients (n=52) ASD group (n=12) Non-ASD group (n=40) p c

Male / Female 14 / 38 1 / 11 13 / 27 0.144

Age (yrs) 65±9 (37-84) 69±8 (58-82) 64±10 (37-84) 0.121

BMI (kg/m2) 24.1±3.6 (17.1-31.5) 23.9±4.3 (17.7-31.5) 24.1±3.4 (17.1-31.2) 0.876

Follow up (months) 62±27 (36-138) 65±19 (60-124) 61±29.4 (36-138) 0.51

PI (degrees) 55.5±9.5 (36-76) 53.1±8 (36-66) 56.3±9.9 (38-76) 0.273

LL (degrees) 47.2±11.2 (27-68) 43.9±11.2 (28-68) 48.2±11.1 (27-68) 0.256

PI-LL (degrees) 8.3±10.8 ( -21-28) 9.2±8.8 (-2-27) 8±11.4 (-21-28) 0.711

PT (degrees) 22.2±7.4 (4-34) 23.9± 7.2(10-34) 21.8±7.5 (4-34) 0.391

SS (degrees) 33.1±7.1 (17-46) 29.2±5.8 (22-36) 34.3±7.1 (17-46) 0.020*

TK (degrees) 28.8±11.8 (8-56) 30.3±12.8 (11-50) 28.4±11.7 (8-56) 0.654

SVA (mm) 49.6±31.2 (-21-108.6) 46.5±19.6 (0-70.2) 50.5±34.1 (-21-108.6) 0.608

a ASD: adjacent segment disease, BMI: body mass index. PI: pelvic incidence, LL: lumbar lordosis, PI-LL: mismatch between the PI and the LL, PT: pelvic tilt, SS: sacral slope, TK: thoracic kyphosis, SVA: sagittal vertical axis.

b Data are expressed as the mean ± standard deviation (range).

c Statistical analyses were performed using the Mann-Whitney U test and Fisher’s exact test. *p<0.05.

Table 2. The adjacent level findings and the trunk muscle parameters before surgery. a

All patients (n=52) ASD group (n=12) Non-ASD group (n=40) p c

Adjacent level findings b

L3-L4 level

Facet angle (degrees) 35.2±8.1 (17.5-55) 35.5±7.4 (23.5-49) 35.1±8.4 (17.5-55) 0.870

Facet tropism (degrees) 4.7±4 (0-21) 3.7±2.3 (0-6) 5± 4.4 (0-21) 0.205

Vacuum phenomenon (n) 7 3 4 0.331

Facet edema (n) 8 3 5 0.366

L5-S1 level

Facet angle (degrees) 50.8±8.2 (21.5-67.5) 48.8±7.9 (33-57) 51.4±8.3 (21.5-67.5) 0.337

Facet tropism (degrees) 7.3±6.9 (0-36) 7.2±4.1 (0-12) 7.4±7.6 (0-36) 0.929

Vacuum phenomenon (n) 13 3 10 1.000

Facet edema (n) 9 3 6 0.414

Trunk muscle parameters d

L4-L 5level

PM (㎟) 1607±551 (926-3165) 1375±390 (926-2386) 1676±577 (718-3165) 0.040*

ES (㎟) 2063±493 (1220-3472) 2024±573 (1220-3167) 2075±474 (1448-3472) 0.781

MF (㎟) 798±258 (139-1282) 581±191 (139-921) 863±240 (359-1282) <0.001*

a  Data are expressed as the mean ± standard deviation (range) or number of positive cases.

b Facet angle, facet tropism, vacuum phenomenon determined on CT, and facet edema on MRI.

c Statistical analyses were performed using the Mann-Whitney U test for the facet angle and facet tropism, and Fisher’s exact test for vacuum phenomenon and facet edema. *p<0.05.

d Trunk muscle parameters were measured on MRI. PM: psoas major muscle, ES: erector spinae muscle, MF: multifidus muscle.

Table 3. %Slip, L4-L5 interbody height, and L4-L5 lordosis angle before and at follow-up a, b

All patients (n=52) ASD group (n=12) Non-ASD group (n=40) p c

Parameters before surgery

%Slip (%) 17.5±7.2(3.3-35.9) 21.3±5.3(15.7-31.3) 16.4±7.4(3.3-35.9) 0.020*

L4-L5 interbody height (mm) 4.7±1.8(0.3-8.6) 4.3±1.9(1.7-8.6) 4.8±1.8(0.3-7.8) 0.410

L4-L5 lordosis angle (degrees) 16.6±4.8(5-27) 16.3±3.3(11-27) 16.8±5.2(5-25) 0.717

Post-operative

%Slip (%) 11.1±6.8(0-32.9) 11.7±5.5(0-21) 11±7.3(0-32.9) 0.709

L4-L5 interbody height (mm) 6.4±1.7(2.3-9.9) 6.2±1.2(5-8.5) 6.5±1.8(2.3-9.9) 0.566

L4-L5 lordosis angle (degrees) 17.8±5.2(3.3-35.9) 17.6±4.9(9-24) 17.9±5.4(8-26) 0.873

a Data are expressed as the mean ± standard deviation (range).

b Statistical analyses were performed using the Mann-Whitney U test between ASD group and Non-ASD group. *p<0.05.

Table 4. Δ%Slip, ΔL4-L5 interbody height, and ΔL4-L5 lordosis angle a, b

All patients (n=52) ASD group (n=12) Non-ASD group (n=40) p c

Δ%slip (%) 6.5±4.6 (2.3-20.4) 9.7±5.6 (2.3-20.4) 5.5±3.9 (0-13.5) 0.030*

ΔL4L-5 interbody height (mm) 1.7±1.2 (-0.3-4.5) 1.9±1.2 (-0.3-3.6) 1.6±1.2 (-0.5-4.5) 0.498

ΔL4-L5 lordosis (degrees) 1.1±2.1 (-3.0-7.0) 1.2±2.9 (-3.0-7.0) 1.1±1.8 (-3.0-6.0) 0.827

a Data are expressed as the mean ± standard deviation (range).

b Statistical analyses were performed using the Mann-Whitney U test between ASD group and Non-ASD group. *p<0.05.

Table 5.

Risk factors for ASD indicated by the stepwise logistic regression analysis.

Risk factors for ASD OR (95％CI) p

Δ%slip 1.22 (1.04-1.43) 0.015*
